# Supplementary material for: A novel mechanism for red emission carbon dots: hydrogen bond dominated molecular states emission
Source: Royal Society of Chemistry journal article supplement (doi:10.1039/c7nr03570e), 2017-01-01
Supplement: c7nr03570e1.pdf [file c7nr03570e1.pdf]

## Supporting Information

### **A novel mechanism for red emission carbon dots: hydrogen bond dominated molecular states emission**

*Tianxiang Zhang,<sup>a</sup> Jinyang Zhu,<sup>b</sup> Yue Zhai,<sup>a</sup> He Wang<sup>b</sup>, Xue Bai,<sup>a</sup> Biao Dong,<sup>a</sup> Haiyu  
Wang, <sup>\*a</sup> Hongwei Song<sup>\*a</sup>*

*<sup>\*a</sup> State Key Laboratory on Integrated Optoelectronics, College of Electronic Science and  
Engineering, Jilin University, 2699 Qianjin Street, Changchun, 130012, China.*

*<sup>b</sup> College of Physics, Jilin University, 2699 Qianjin Street, Changchun, 130012, China.*

### Solvents and parameters.

For the simplicity, the organic solvents acronyms and the parameters was used as follows:

| No. | Solvents          | Solvents acronyms | <sup>a</sup> Solvents $\Delta f$ | <sup>b</sup> Parameter $E_{30}(T)$ | <sup>c</sup> HB index | <sup>d</sup> Kamlet-Taft Parameters |          |         |
|-----|-------------------|-------------------|----------------------------------|------------------------------------|-----------------------|-------------------------------------|----------|---------|
|     |                   |                   |                                  |                                    |                       | $\pi^*$                             | $\alpha$ | $\beta$ |
| 1   | Chloroform        | TCM               | 0.1459                           | 39.1                               | 1.5                   | 0.58                                | 0.44     | 0.00    |
| 2   | 1,4-Dioxane       | DX                | 0.0204                           | 36.0                               | 9.7                   | 0.55                                | 0.00     | 0.37    |
| 3   | Dichloromethane   | DCM               | 0.2185                           | 40.7                               | 1.5                   | 0.73                                | 0.30     | 0.00    |
| 4   | Ethyl acetate     | EAC               | 0.2002                           | 38.1                               | 8.4                   | 0.55                                | 0.00     | 0.45    |
| 5   | Acetone           | DMK               | 0.2846                           | 42.2                               | 9.7                   | 0.71                                | 0.08     | 0.48    |
| 6   | Acetonitrile      | ACN               | 0.3046                           | 45.6                               | 13                    | 0.75                                | 0.19     | 0.31    |
| 7   | Dimethylformamide | DMF               | 0.2744                           | 43.2                               | 11.7                  | 0.88                                | 0.00     | 0.69    |
| 8   | Dimethylsulfoxide | DMSO              | 0.2630                           | 45.1                               | 7.7                   | 1.00                                | 0.00     | 0.76    |
| 9   | Formamide         | FA                | 0.2822                           | 55.8                               | -                     | 0.97                                | 0.71     | 0.48    |
| 10  | Methanol          | MA                | 0.3086                           | 55.4                               | 18.7                  | 0.60                                | 0.93     | 0.62    |
| 11  | Ethanol           | EA                | 0.2887                           | 51.9                               | 18.7                  | 0.54                                | 0.83     | 0.77    |
| 12  | n-Propanol        | NPA               | 0.2741                           | 50.7                               | 18.7                  | 0.52                                | 0.78     | 0.80    |
| 13  | n-Butyl alcohol   | NBA               | 0.2619                           | 49.7                               | 18.7                  | 0.47                                | 0.79     | 0.88    |
| 14  | n-Amyl alcohol    | NAA               | 0.1987                           | 49.1                               | 18.7                  | -                                   | -        | -       |
| 15  | n-Hexyl alcohol   | NHA               | 0.2033                           | 48.8                               | -                     | -                                   | -        | -       |
| 16  | Ethylene glycol   | EG                | 0.2745                           | 56.3                               | 20.6                  | 0.92                                | 0.90     | 0.52    |

\*<sup>a</sup> solvents  $\Delta f$ : calculated using the following formula:

$$\Delta f = \frac{\varepsilon - 1}{2\varepsilon + 1} - \frac{n^2 - 1}{2n^2 + 1}$$

the used parameter  $n$  and  $\varepsilon$  is obtained from the George Wypych, *Databook of Green Solvents*, 1<sup>st</sup> Edition, 2014, ChemTec Publishing.

\*<sup>b</sup> Parameter  $E_T(30)$ : The same as \*<sup>a</sup>.

\*<sup>c</sup> HB index: Dwight G. Weldon, *Failure Analysis of Paints and Coatings*, 3<sup>rd</sup> Edition, 2009, John Wiley & Sons, Page 60-62,

\*<sup>d</sup> Kamlet-Taft parameter: *J. org. Chem*, 1983, 48(17): 2877-2887.

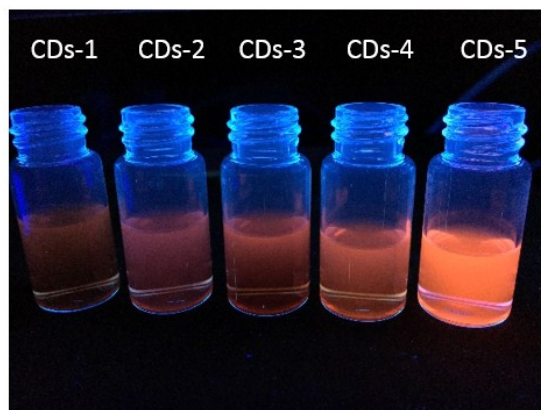

Figure S1. Digital photograph of different CDs samples under UV lamp (365 nm excitation).

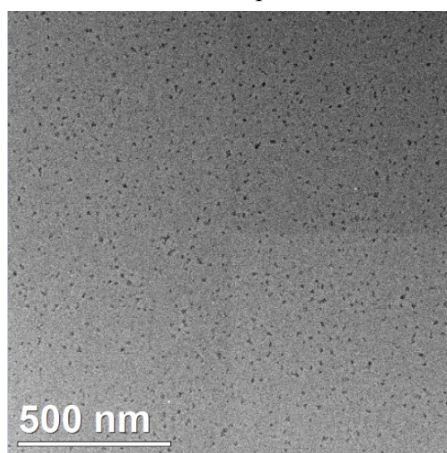

Figure S2. The TEM images of the CDs prepared in toluene (CDs-5) at lower magnification.

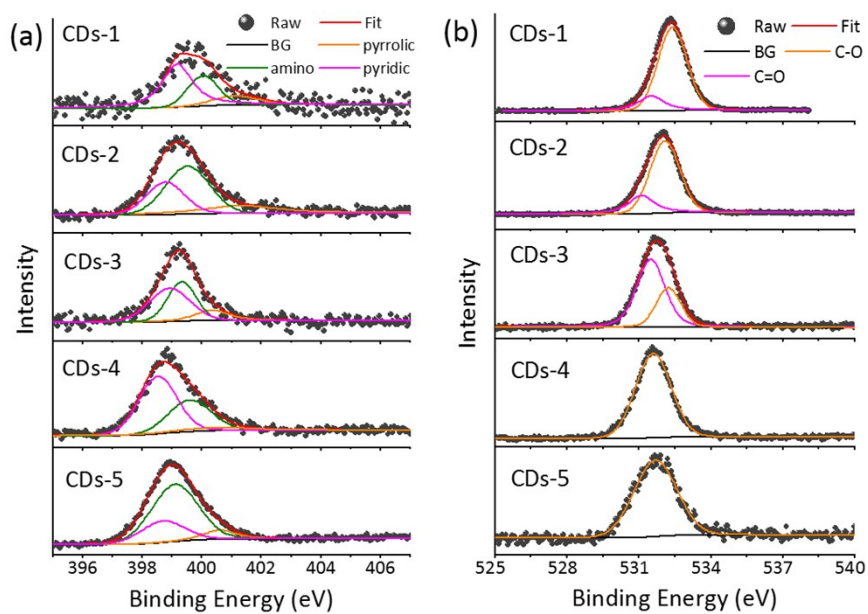

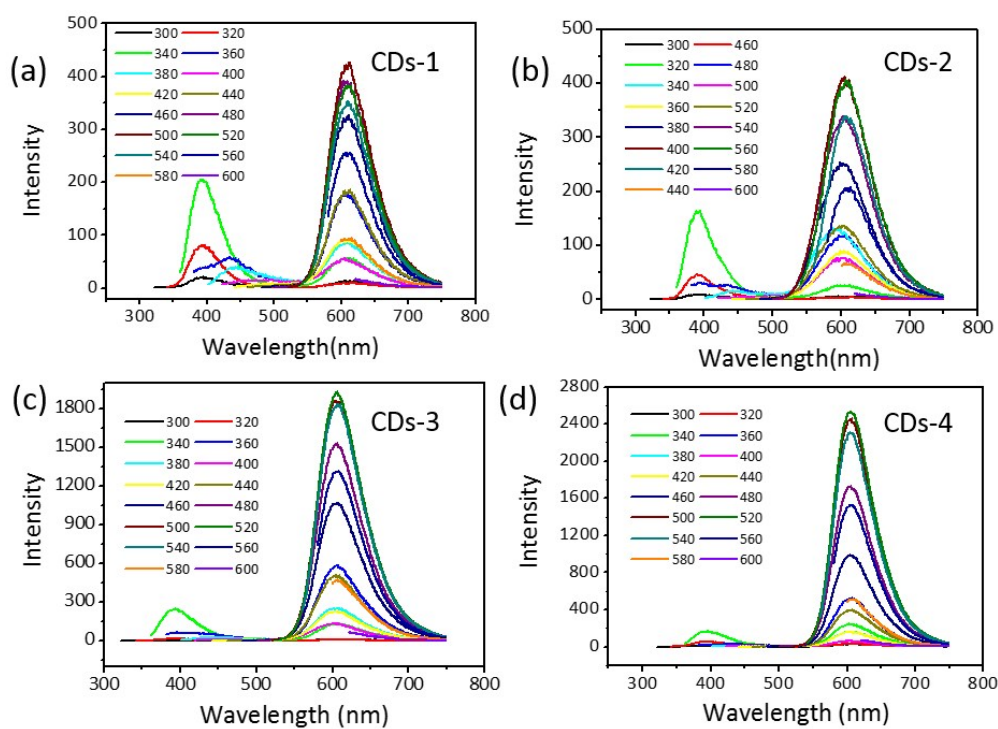

Figure S4. (a-d) The emission spectra for CDs-1 to CDs-4 under different excitation wavelength from 300 nm to 600 nm.

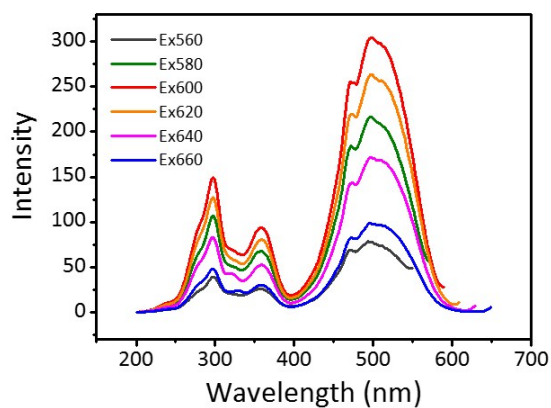

Figure S5. The PLE spectra for CDs-5 monitored at different wavelength from 300 nm to 600 nm.

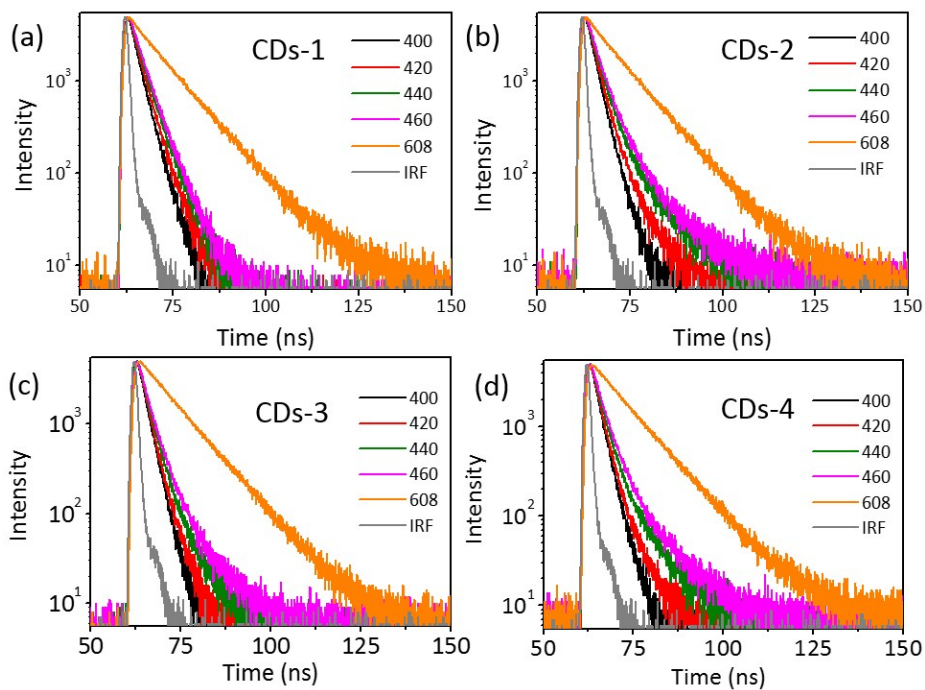

Figure S6. (a-d) The decay of from CDs1 to CDs-4 monitored at different emission wavelength.

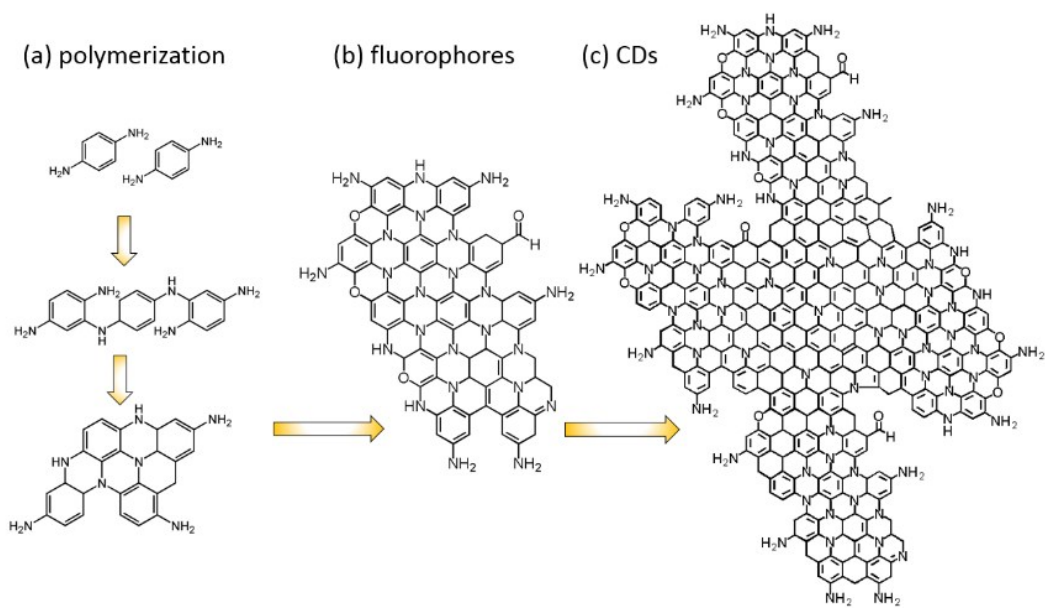

Figure S7. Illustration of the formation process of CDs based on polymerization of PPD. (a) polymerization of PPD, (b) formation of nitrogen contained fluorophores and (c) possible structure of CDs.

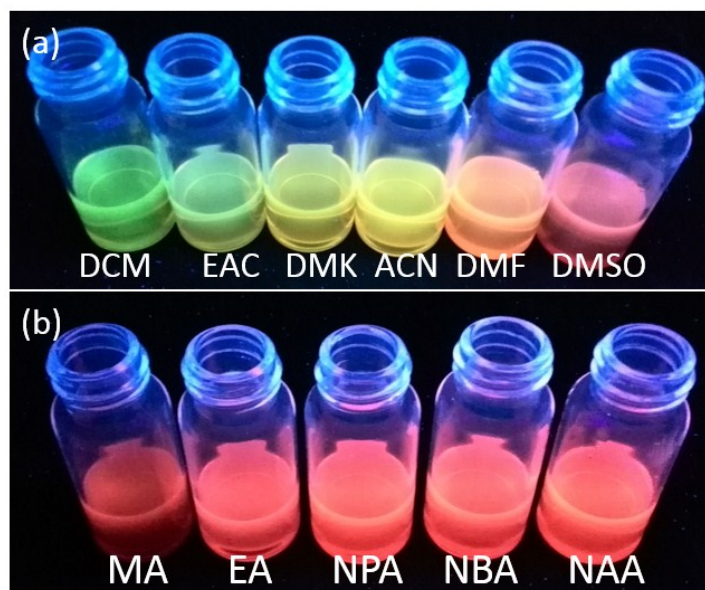

Figure S8. The digital photos of CDs-5 in different solvents excited under 365 UV lamp. (a) The images of CDs-5 in aprotic solvents and (b) in protic solvents.

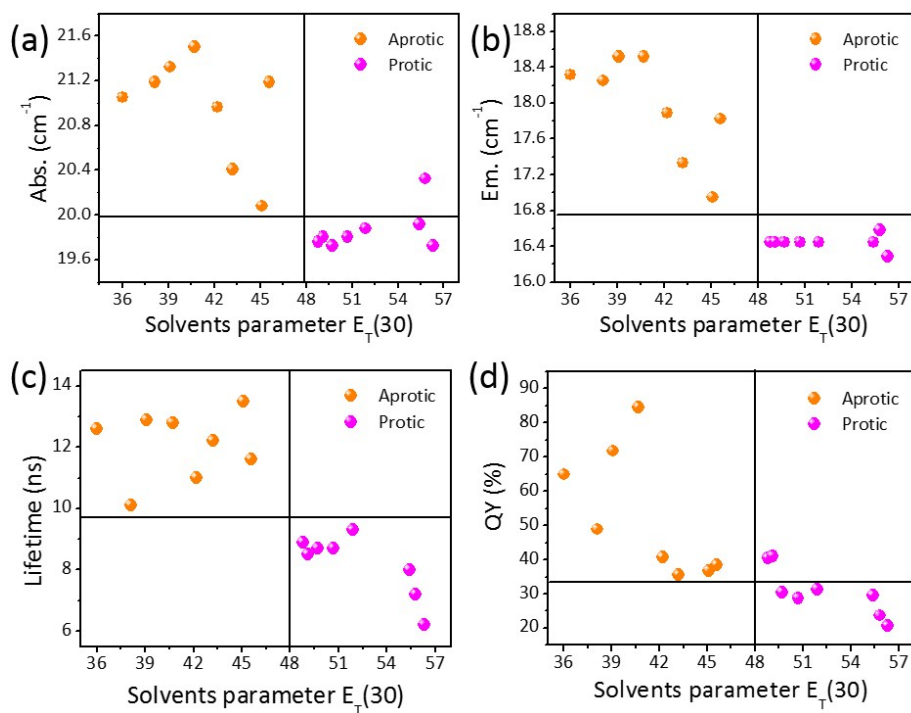

Figure S9: Dimroth-Reichard plot between classical solvents polarity parameter  $E_T(30)$  and spectral parameters of CDs-5, specifically, (a) absorption, (b) emission wavenumber, (c) lifetime and (d) QY, respectively.

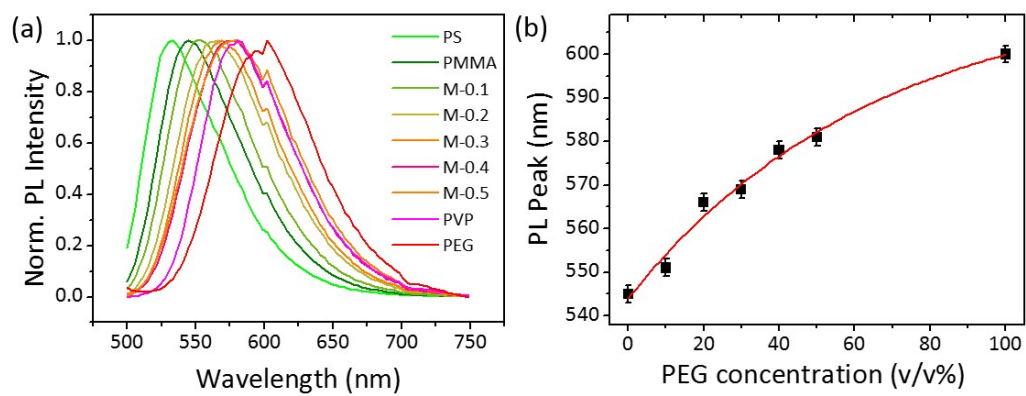

Figure S10: (a) The emission spectra of CDs-polymers. M-0.1 to M-0.5 was the abbreviation for CDs in PEG/PMMA mixture matrix with different proportion from 10% to 50%, respectively. (b) The relationship between emission peak and the volume proportion of PEG in PMMA.

Table S1. The elements proportion for different CDs samples.

| Samples | C%   | N%   | O%   |
|---------|------|------|------|
| CDs-1   | 45.2 | 2.7  | 52.1 |
| CDs-2   | 62.5 | 5.5  | 32.0 |
| CDs-3   | 72.8 | 7.6  | 19.6 |
| CDs-4   | 73.9 | 9.1  | 17.0 |
| CDs-5   | 56.1 | 27.8 | 16.1 |

Table S2. The decay fitting parameter for different CDs samples at different wavelength.

| CDs-1  | $t_1$ /ns | $f_1$ | $t_2$ /ns | $f_2$ | $\langle t \rangle$ /ns | $\chi^2$ |
|--------|-----------|-------|-----------|-------|-------------------------|----------|
| 400 nm | 1.7       | 0.39  | 3.1       | 0.61  | 2.55                    | 1.04     |
| 420 nm | 2.0       | 0.45  | 3.9       | 0.55  | 3.05                    | 1.09     |
| 440 nm | 2.2       | 0.38  | 4.4       | 0.62  | 3.55                    | 1.16     |
| 460 nm | 2.4       | 0.38  | 4.6       | 0.62  | 3.76                    | 1.19     |
| 608 nm | 1.0       | 0.001 | 9.2       | 1.00  | 9.17                    | 1.19     |
| CDs-2  | $t_1$ /ns | $f_1$ | $t_2$ /ns | $f_2$ | $\langle t \rangle$ /ns | $\chi^2$ |
| 400 nm | 1.8       | 0.59  | 3.4       | 0.41  | 2.46                    | 1.04     |
| 420 nm | 2.1       | 0.64  | 5.7       | 0.36  | 3.41                    | 1.09     |
| 440 nm | 2.4       | 0.53  | 7.6       | 0.47  | 4.83                    | 1.25     |
| 460 nm | 2.6       | 0.50  | 8.0       | 0.50  | 5.29                    | 1.23     |
| 608 nm | 1.3       | 0.001 | 9.2       | 0.99  | 9.13                    | 1.22     |
| CDs-3  | $t_1$ /ns | $f_1$ | $t_2$ /ns | $f_2$ | $\langle t \rangle$ /ns | $\chi^2$ |
| 400 nm | 1.6       | 0.43  | 2.6       | 0.57  | 2.17                    | 0.97     |
| 420 nm | 1.9       | 0.71  | 4.4       | 0.29  | 2.63                    | 1.07     |
| 440 nm | 2.1       | 0.61  | 5.6       | 0.39  | 3.45                    | 1.18     |
| 460 nm | 2.2       | 0.52  | 6.0       | 0.48  | 4.03                    | 1.18     |
| 608 nm | 2.4       | 0.001 | 9.2       | 1.00  | 9.14                    | 1.20     |
| CDs-4  | $t_1$ /ns | $f_1$ | $t_2$ /ns | $f_2$ | $\langle t \rangle$ /ns | $\chi^2$ |
| 400 nm | 1.7       | 0.59  | 3.0       | 0.41  | 2.23                    | 1.10     |
| 420 nm | 2.0       | 0.70  | 5.7       | 0.30  | 3.13                    | 1.12     |
| 440 nm | 2.2       | 0.55  | 7.3       | 0.45  | 4.51                    | 1.18     |
| 460 nm | 2.4       | 0.49  | 7.6       | 0.51  | 5.08                    | 1.14     |
| 608 nm | 2.1       | 0.001 | 9.3       | 0.99  | 9.25                    | 1.17     |
| CDs-5  | $t_1$ /ns | $f_1$ | $t_2$ /ns | $f_2$ | $\langle t \rangle$ /ns | $\chi^2$ |
| 400 nm | 1.6       | 0.17  | 4.1       | 0.83  | 3.69                    | 1.41     |
| 420 nm | 2.8       | 0.51  | 6.4       | 0.49  | 4.58                    | 1.19     |
| 440 nm | 3.1       | 0.53  | 7.7       | 0.47  | 5.27                    | 1.07     |
| 460 nm | 3.2       | 0.55  | 7.6       | 0.45  | 5.16                    | 1.11     |
| 608 nm | 1.0       | 0.001 | 9.4       | 1.00  | 9.38                    | 1.23     |

\* $\langle t \rangle$  average lifetime.\* $\chi^2$  fitting Chi-squared.



Table S3. The decay fitting parameter for CDs-5 at different wavelength.

| Wavelength | $\langle t \rangle$ /ns | $\chi^2$ |
|------------|-------------------------|----------|
| 568 nm     | 9.36                    | 1.09     |
| 588 nm     | 9.32                    | 1.19     |
| 608 nm     | 9.34                    | 1.13     |
| 628 nm     | 9.33                    | 1.2      |
| 648 nm     | 9.35                    | 1.2      |

Table S4. The decay parameter for CDs-5 in different solvents.

| Solvents | Wavelength /nm | $\langle t \rangle$ /ns | $\chi^2$ |
|----------|----------------|-------------------------|----------|
| TCM      | 540            | 12.9                    | 1.19     |
| DX       | 546            | 12.6                    | 1.23     |
| DCM      | 540            | 12.8                    | 1.25     |
| EAC      | 548            | 10.1                    | 1.16     |
| DMK      | 559            | 11.0                    | 1.11     |
| ACN      | 561            | 11.6                    | 1.14     |
| DMF      | 577            | 12.2                    | 1.21     |
| DMSO     | 590            | 13.5                    | 1.18     |
| FA       | 603            | 7.2                     | 1.17     |
| MA       | 608            | 8.0                     | 1.18     |
| EA       | 608            | 9.3                     | 1.13     |
| NPA      | 608            | 8.7                     | 1.18     |
| NBA      | 608            | 8.7                     | 1.21     |
| NAA      | 608            | 8.5                     | 1.18     |
| NHA      | 608            | 8.9                     | 1.14     |
| EG       | 614            | 6.2                     | 1.33     |

Table S5. The supplementary spectral parameter data of CDs-5 in different solvents.

| No. | Solvents          | acronyms | Absorption (cm <sup>-1</sup> )<br>×1000 | Emission (cm <sup>-1</sup> )<br>×1000 | Stokes shift (cm <sup>-1</sup> )<br>×1000 | k <sub>r</sub> (10 <sup>-9</sup> s <sup>-1</sup> ) | k <sub>nr</sub> (10 <sup>-9</sup> s <sup>-1</sup> ) |
|-----|-------------------|----------|-----------------------------------------|---------------------------------------|-------------------------------------------|----------------------------------------------------|-----------------------------------------------------|
| 1   | Chloroform        | TCM      | 21.321                                  | 18.518                                | 2.803                                     | 0.057                                              | 0.022                                               |
| 2   | 1,4-Dioxane       | DX       | 21.052                                  | 18.315                                | 2.737                                     | 0.052                                              | 0.028                                               |
| 3   | Dichloromethane   | DCM      | 21.505                                  | 18.518                                | 2.987                                     | 0.066                                              | 0.012                                               |
| 4   | Ethyl acetate     | EAC      | 21.186                                  | 18.248                                | 2.938                                     | 0.048                                              | 0.051                                               |
| 5   | Acetone           | DMK      | 20.964                                  | 17.889                                | 3.075                                     | 0.037                                              | 0.054                                               |
| 6   | Acetonitrile      | ACN      | 21.186                                  | 17.825                                | 3.361                                     | 0.033                                              | 0.053                                               |
| 7   | Dimethylformamide | DMF      | 20.408                                  | 17.331                                | 3.077                                     | 0.029                                              | 0.053                                               |
| 8   | Dimethylsulfoxide | DMSO     | 20.080                                  | 16.949                                | 3.131                                     | 0.027                                              | 0.047                                               |
| 9   | Formamide         | FA       | 20.325                                  | 16.584                                | 3.741                                     | 0.033                                              | 0.106                                               |
| 10  | Methanol          | MA       | 19.920                                  | 16.447                                | 3.473                                     | 0.037                                              | 0.088                                               |
| 11  | Ethanol           | EA       | 19.880                                  | 16.447                                | 3.433                                     | 0.034                                              | 0.074                                               |
| 12  | n-Propanol        | NPA      | 19.801                                  | 16.447                                | 3.354                                     | 0.033                                              | 0.082                                               |
| 13  | n-Butyl alcohol   | NBA      | 19.723                                  | 16.447                                | 3.276                                     | 0.035                                              | 0.080                                               |
| 14  | n-Amyl alcohol    | NAA      | 19.801                                  | 16.447                                | 3.354                                     | 0.048                                              | 0.069                                               |
| 15  | n-Hexyl alcohol   | NHA      | 19.762                                  | 16.447                                | 3.315                                     | 0.045                                              | 0.067                                               |
| 16  | Ethylene glycol   | EG       | 19.723                                  | 16.287                                | 3.436                                     | 0.033                                              | 0.128                                               |

\*  $k_r$  is the abbreviation of radiation rate, which is calculated by  $k_r = \Phi/\tau$ , where  $\Phi$  is the QY, and  $\tau$  is the fluorescent average lifetime.

\*  $k_{nr}$  is the abbreviation of non-radiation rate, which is calculated by  $k_{nr} = (1-\Phi)/\tau$ .

Table S6. The decay parameter for CDs-5 in DCM/ EA binary mixture solvents.

| EA in DCM | Wavelength/nm | $\langle t \rangle$ /ns | $\chi^2$ |
|-----------|---------------|-------------------------|----------|
| 0.0%      | 540           | 12.13                   | 1.31     |
| 0.5%      | 542           | 12.34                   | 1.40     |
| 1.0%      | 548           | 11.70                   | 1.41     |
| 2.0%      | 571           | 11.13                   | 1.34     |
| 4.0%      | 583           | 10.29                   | 1.53     |
| 9.0%      | 592           | 9.63                    | 1.19     |
